# Supplementary material
Source: PubMed Central journal article supplement (PMC2697299)
Supplement: tjp0587-2299-SD1.pdf [file tjp0587-2299-SD1.pdf]

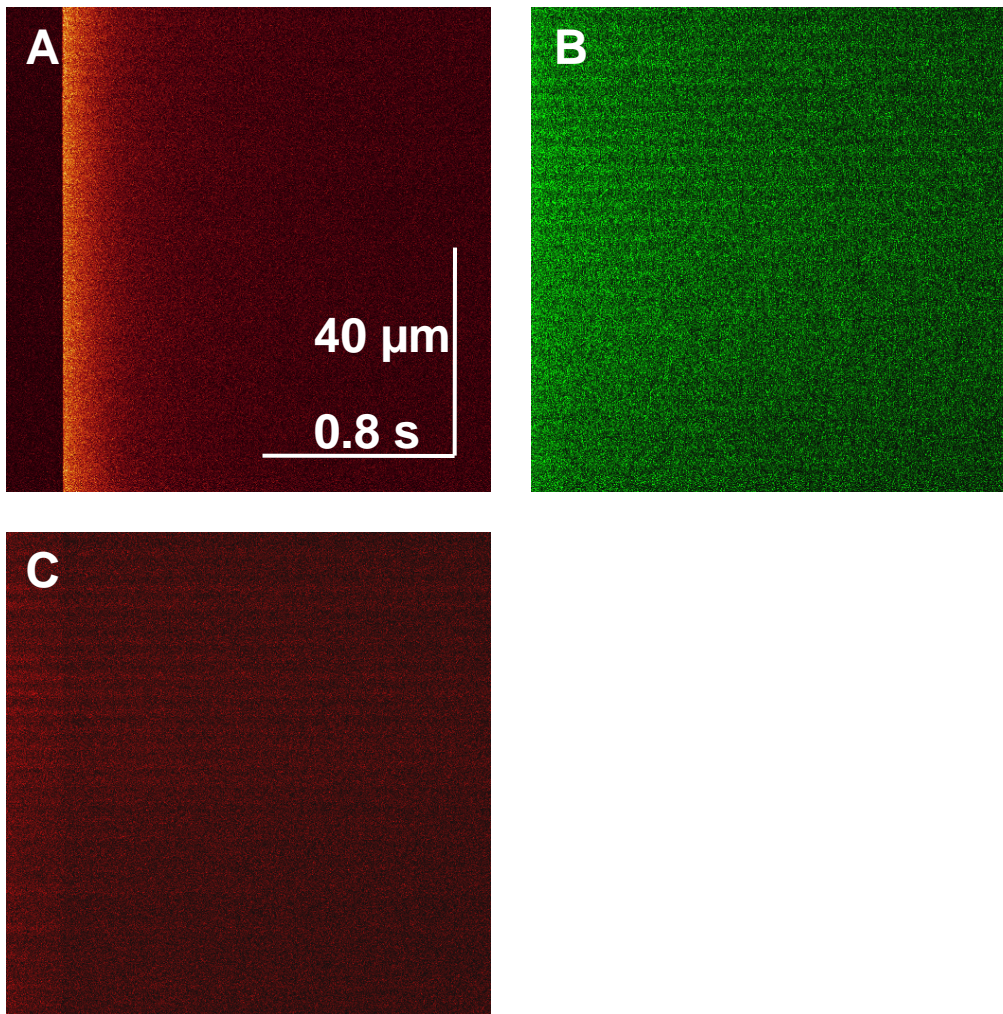

Supplementary Fig 1: Transverse tubules are visible during a linescan along the long axis of the fibre (images not filtered). A,  $F_3/F_{3,0}$  B,  $F_1$  and C,  $F_2$ . Note that the striated pattern of the t-system is apparent.  $F_1$  is the virtually isosbestic point and therefore the signal changes little and  $F_2$  signal decreases with increasing  $\text{Ca}^{2+}$  (Launikonis et al., 2005). In this example there was an outward flux to the t-system.
